# Supplementary figures and images for: The Botrytis cinerea Gene Expression Browser
Source: MDPI journal article supplement (doi:10.3390/jof9010084), 2023-01-06

## Botrytis cinerea Expression Browser (BEB) Data Processing Flow Chart

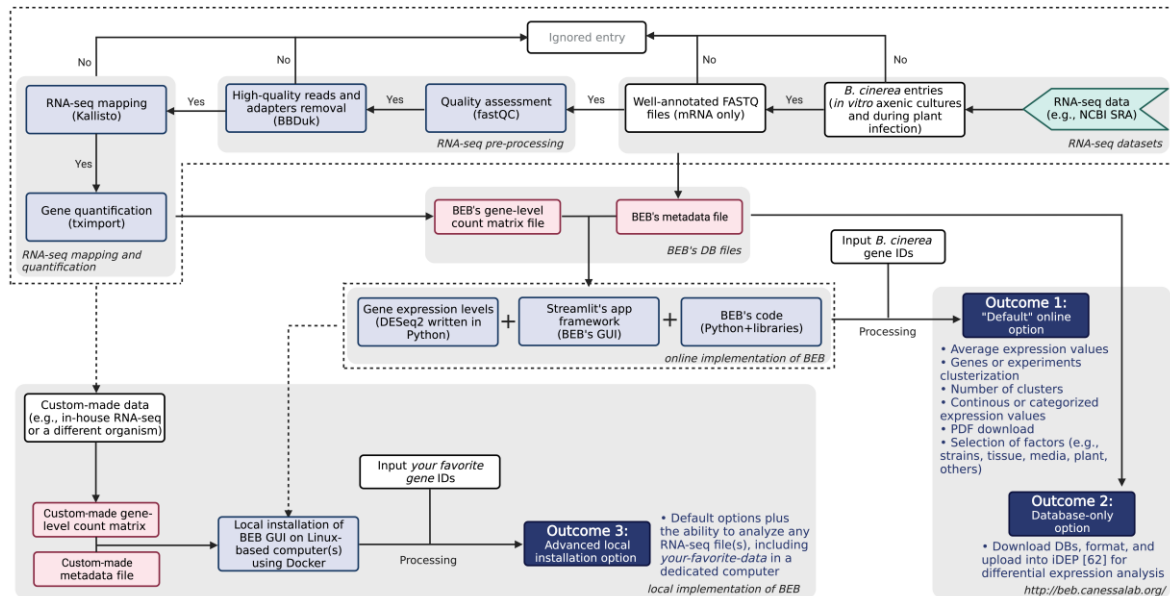

Legend:

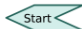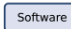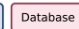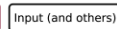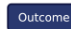

Supplement: s1 [file s1]

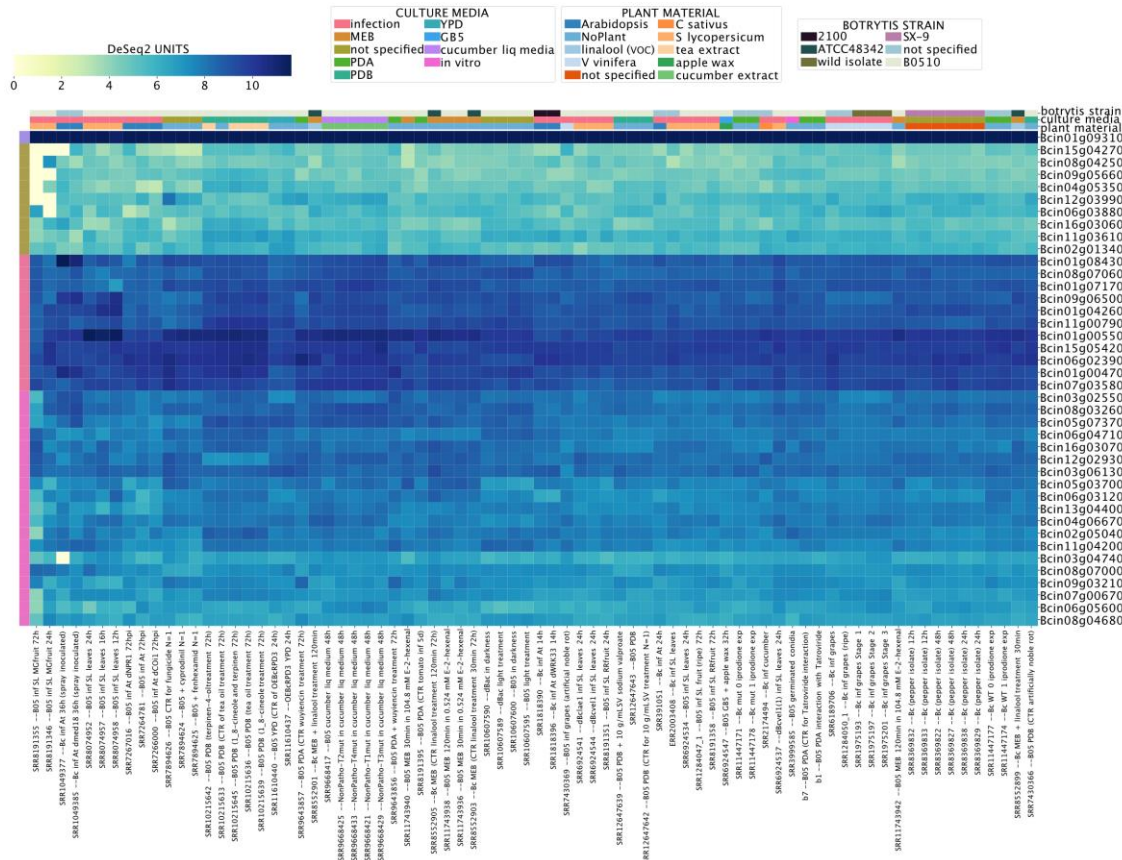

Supplement: s1 [file s1]
